# Supplementary material
Source: PubMed Central journal article supplement (PMC4123939)
Supplement: pr500307f_si_001.pdf [file pr500307f_si_001.pdf]

**Fig. S1.** Multiple sequence alignment of SP-A isoforms used in database searching.

```
SP-A1_6A_      MWLCPLALNLILMAASGAVCEVKDVCVSGSPGIPGTTPGSHGLPGRDGRDGLKGDPPGPPGPM 60
SP-A1_6A2_    MWLCPLALNLILMAASGAVCEVKDVCVSGSPGIPGTTPGSHGLPGRDGRDGLKGDPPGPPGPM 60
SP-A1_6A4_    MWLCPLALNLILMAASGAVCEVKDVCVSGSPGIPGTTPGSHGLPGRDGRDGLKGDPPGPPGPM 60
SP-A2_1A_     MWLCPLALNLILMAASGAACEVKDVCVSGSPGIPGTTPGSHGLPGRDGRDGLKGDPPGPPGPM 60
SP-A2_1A0_    MWLCPLALNLILMAASGAACEVKDVCVSGSPGIPGTTPGSHGLPGRDGRDGLKGDPPGPPGPM 60
SP-A2_1A1_    MWLCPLALNLILMAASGAACEVKDVCVSGSPGIPGTTPGSHGLPGRDGRDGLKGDPPGPPGPM 60
*****

SP-A1_6A_      GPPGEMPCPPGNDGLPGAPGIPGECGEGEPGERGPPGLPAHLDEELQATLHDFRHQILQ 120
SP-A1_6A2_    GPPGEMPCPPGNDGLPGAPGIPGECGEGEPGERGPPGLPAHLDEELQATLHDFRHQILQ 120
SP-A1_6A4_    GPPGEMPCPPGNDGLPGAPGIPGECGEGEPGERGPPGLPAHLDEELQATLHDFRHQILQ 120
SP-A2_1A_     GPPGETPCPPGNNGLPGAPGVPGERGEKGEGERGPPGLPAHLDEELQATLHDFRHQILQ 120
SP-A2_1A0_    GPPGETPCPPGNNGLPGAPGVPGERGEKGEAGERGPPGLPAHLDEELQATLHDFRHQILQ 120
SP-A2_1A1_    GPPGETPCPPGNNGLPGAPGVPGERGEKGEAGERGPPGLPAHLDEELQATLHDFRHQILQ 120
*****

SP-A1_6A_      TRGALSLQGSIMTVGEKVFSSNGQSITFDAIQEACARAGGRIAVPRNPEENEAIASFVKK 180
SP-A1_6A2_    TRGALSLQGSIMTVGEKVFSSNGQSITFDAIQEACARAGGRIAVPRNPEENEAIASFVKK 180
SP-A1_6A4_    TRGALSLQGSIMTVGEKVFSSNGQSITFDAIQEACARAGGRIAVPRNPEENEAIASFVKK 180
SP-A2_1A_     TRGALSLQGSIMTVGEKVFSSNGQSITFDAIQEACARAGGRIAVPRNPEENEAIASFVKK 180
SP-A2_1A0_    TRGALSLQGSIMTVGEKVFSSNGQSITFDAIQEACARAGGRIAVPRNPEENEAIASFVKK 180
SP-A2_1A1_    TRGALSLQGSIMTVGEKVFSSNGQSITFDAIQEACARAGGRIAVPRNPEENEAIASFVKK 180
*****

SP-A1_6A_      YNTYAYVGLTEGPPSPGDFRYS DGTPVNYTNWYRGEPAGRGKEQCVEMYTDGQWNRNCLY 240
SP-A1_6A2_    YNTYAYVGLTEGPPSPGDFRYS DGTPVNYTNWYRGEPAGRGKEQCVEMYTDGQWNRNCLY 240
SP-A1_6A4_    YNTYAYVGLTEGPPSPGDFRYS DGTPVNYTNWYRGEPAGRGKEQCVEMYTDGQWNRNCLY 240
SP-A2_1A_     YNTYAYVGLTEGPPSPGDFRYS DGTPVNYTNWYRGEPAGRGKEQCVEMYTDGQWNRNCLY 240
SP-A2_1A0_    YNTYAYVGLTEGPPSPGDFRYS DGTPVNYTNWYRGEPAGRGKEQCVEMYTDGQWNRNCLY 240
SP-A2_1A1_    YNTYAYVGLTEGPPSPGDFRYS DGTPVNYTNWYRGEPAGRGKEKCVEMYTDGQWNRNCLY 240
*****

SP-A1_6A_      SRLTICEF 248
SP-A1_6A2_    SRLTICEF 248
SP-A1_6A4_    SRLTICEF 248
SP-A2_1A_     SRLTICEF 248
SP-A2_1A0_    SRLTICEF 248
SP-A2_1A1_    SRLTICEF 248
*****
```
